# Supplementary material for: Dependence of UO2 surface morphology on processing history within a single synthetic route
Source: publisher site journal article supplement (doi:10.1515/ract-2018-3065), 2019-04-18
Supplement: Supplementary file 1 [file Radiochimica Acta SI_revisions.pdf › Supplement/Radiochimica Acta SI_revisions.pdf]

# Dependence of UO<sub>2</sub> Surface Morphology on Processing History within a Single Synthetic Route

Erik C. Abbott<sup>a</sup>, Alexandria Brenkmann<sup>a</sup>, Craig Galbraith<sup>a</sup>, Joshua Ong<sup>b</sup>, Ian J. Schwerdt<sup>a</sup>, Brent D. Albrecht<sup>b</sup>, Tolga Tasdizen<sup>b</sup> Luther W. McDonald IV<sup>a</sup>

*<sup>a</sup>University of Utah Department of Civil and Environmental Engineering-Nuclear Engineering Program, 201 Presidents Circle, Salt Lake City, UT 84112, United States*

*<sup>b</sup>University of Utah Scientific Computing and Imaging Institute, 72 S Central Campus Drive, Salt Lake City, UT 84112, United States*

**Corresponding Author:** Luther W. McDonald. 110 Central Campus Dr. Suite 2000, Salt Lake City, UT 84112. [Luther.mcdonald@utah.edu](mailto:Luther.mcdonald@utah.edu), 801-581-7768

**KEYWORDS.** Nuclear Forensics, Morphology, X-ray Diffraction, X-ray Photoelectron Spectroscopy, Scanning Electron Microscopy

## Table of Contents

|                                                                                             |    |
|---------------------------------------------------------------------------------------------|----|
| Table S-1. X-ray Photoelectron Spectroscopy Scan Settings .....                             | 3  |
| Table S-2. Machine Learning Training Modules.....                                           | 4  |
| Figure S-1. Intermediate U-oxides and Resulting $\text{UO}_2$ .....                         | 5  |
| Figure S-2. SEM Image of $\text{UO}_2$ Synthesized from Am- $\text{UO}_3$ .....             | 6  |
| Figure S-3. SEM Image of $\text{UO}_2$ Synthesized from Am- $\text{UO}_3$ .....             | 7  |
| Figure S-4. SEM Image of $\text{UO}_2$ Synthesized from Am- $\text{UO}_3$ .....             | 8  |
| Figure S-5. SEM Image of $\text{UO}_2$ Synthesized from Am- $\text{UO}_3$ .....             | 9  |
| Figure S-6. SEM Image of $\text{UO}_2$ Synthesized from Am- $\text{UO}_3$ .....             | 10 |
| Figure S-7. SEM Image of $\text{UO}_2$ Synthesized from Am- $\text{UO}_3$ .....             | 11 |
| Figure S-8. SEM Image of $\text{UO}_2$ Synthesized from $\alpha$ - $\text{UO}_3$ .....      | 12 |
| Figure S-9. SEM Image of $\text{UO}_2$ Synthesized from $\alpha$ - $\text{UO}_3$ .....      | 13 |
| Figure S-10. SEM Image of $\text{UO}_2$ Synthesized from $\alpha$ - $\text{UO}_3$ .....     | 14 |
| Figure S-11. SEM Image of $\text{UO}_2$ Synthesized from $\alpha$ - $\text{UO}_3$ .....     | 15 |
| Figure S-12. SEM Image of $\text{UO}_2$ Synthesized from $\alpha$ - $\text{UO}_3$ .....     | 16 |
| Figure S-13. SEM Image of $\text{UO}_2$ Synthesized from $\alpha$ - $\text{UO}_3$ .....     | 17 |
| Figure S-14. SEM Image of $\text{UO}_2$ Synthesized from $\text{U}_3\text{O}_8$ .....       | 18 |
| Figure S-15. SEM Image of $\text{UO}_2$ Synthesized from $\text{U}_3\text{O}_8$ .....       | 19 |
| Figure S-16. SEM Image of $\text{UO}_2$ Synthesized from $\text{U}_3\text{O}_8$ .....       | 20 |
| Figure S-17. SEM Image of $\text{UO}_2$ Synthesized from $\text{U}_3\text{O}_8$ .....       | 21 |
| Figure S-18. SEM Image of $\text{UO}_2$ Synthesized from $\text{U}_3\text{O}_8$ .....       | 22 |
| Figure S-19. SEM Image of $\text{UO}_2$ Synthesized from $\text{U}_3\text{O}_8$ .....       | 23 |
| Figure S-20. Segmented Image of Am- $\text{UO}_3$ .....                                     | 24 |
| Figure S-21. Segmented Image of $\text{U}_3\text{O}_8$ .....                                | 25 |
| Figure S-22. Segmented image of $\text{UO}_2$ synthesized from Am- $\text{UO}_3$ .....      | 26 |
| Figure S-23. Segmented image of $\text{UO}_2$ synthesized from $\text{U}_3\text{O}_8$ ..... | 27 |

Table S-1. X-ray Photoelectron Spectroscopy scan settings which were used during each scan. The Charge Neutralize Test was used to determine the need to use the electron gun to manage the effects of charging. The low-resolution Survey scan was used to identify which elements were present in the sample. The high-resolution scan for each element were for analysis.

| <b>Scan</b>            | <b>Pass Energy (eV)</b> | <b>Scan Range (eV)</b> | <b>Step Size (eV)</b> | <b>Dwell Time (ms)</b> | <b>Sweeps</b> |
|------------------------|-------------------------|------------------------|-----------------------|------------------------|---------------|
| Charge Neutralize Test | 40                      | 270-300                | 0.1                   | 150                    | 1             |
| Survey                 | 160                     | 0-1400                 | 1                     | 100                    | 1             |
| O 1s                   | 40                      | 520-545                | 0.1                   | 500                    | 1             |
| U 4f                   | 40                      | 360-420                | 0.1                   | 500                    | 1             |
| C 1s                   | 40                      | 270-295                | 0.1                   | 500                    | 1             |

Table S-2. Machine Learning training modules which were used to train and evaluate the data. These data were partitioned into different bins and trained and evaluated using five different models and shown in the table.

|               | <b>Bin 1</b> | <b>Bin 2</b> | <b>Bin 3</b> | <b>Bin 4</b> | <b>Bin 5</b> |
|---------------|--------------|--------------|--------------|--------------|--------------|
| <b>Fold 1</b> | Train        | Train        | Train        | Train        | Evaluate     |
| <b>Fold 2</b> | Train        | Train        | Train        | Evaluate     | Train        |
| <b>Fold 3</b> | Train        | Train        | Evaluate     | Train        | Train        |
| <b>Fold 4</b> | Train        | Evaluate     | Train        | Train        | Train        |
| <b>Fold 5</b> | Evaluate     | Train        | Train        | Train        | Train        |

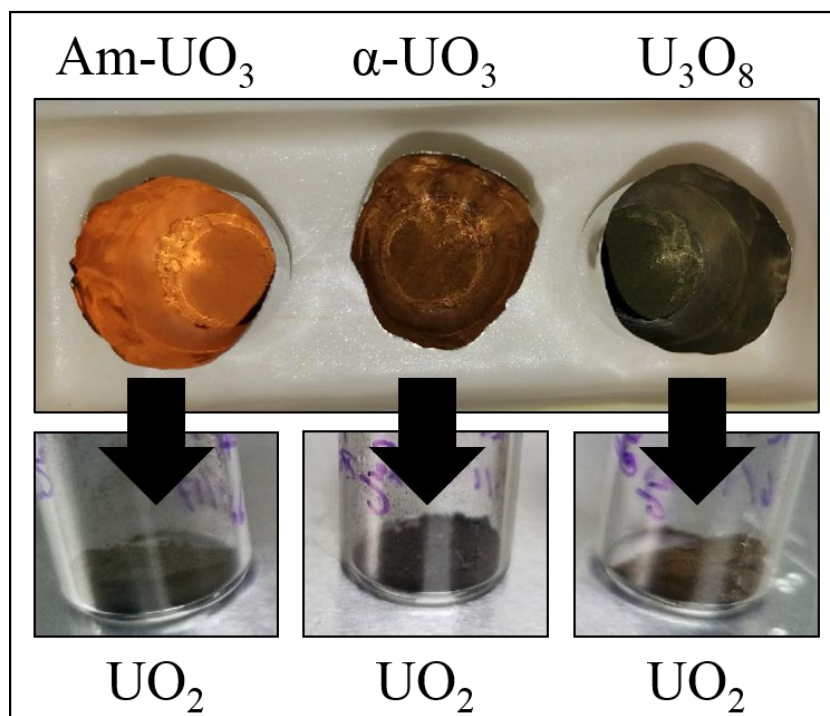

Figure S-1. Intermediate U-oxides and resulting  $\text{UO}_2$ . Am- $\text{UO}_3$  (top left),  $\alpha$ - $\text{UO}_3$  (top center), and  $\text{U}_3\text{O}_8$  (top right) were simultaneously reduced to  $\text{UO}_2$  via hydrogen reduction in the same atmosphere controlled furnace. A 50:50 mixture of  $\text{H}_2$  and He were flowed through the furnace at 500 mL/min for 5 hours at 510 °C. The resulting  $\text{UO}_2$  (bottom) are shown above.

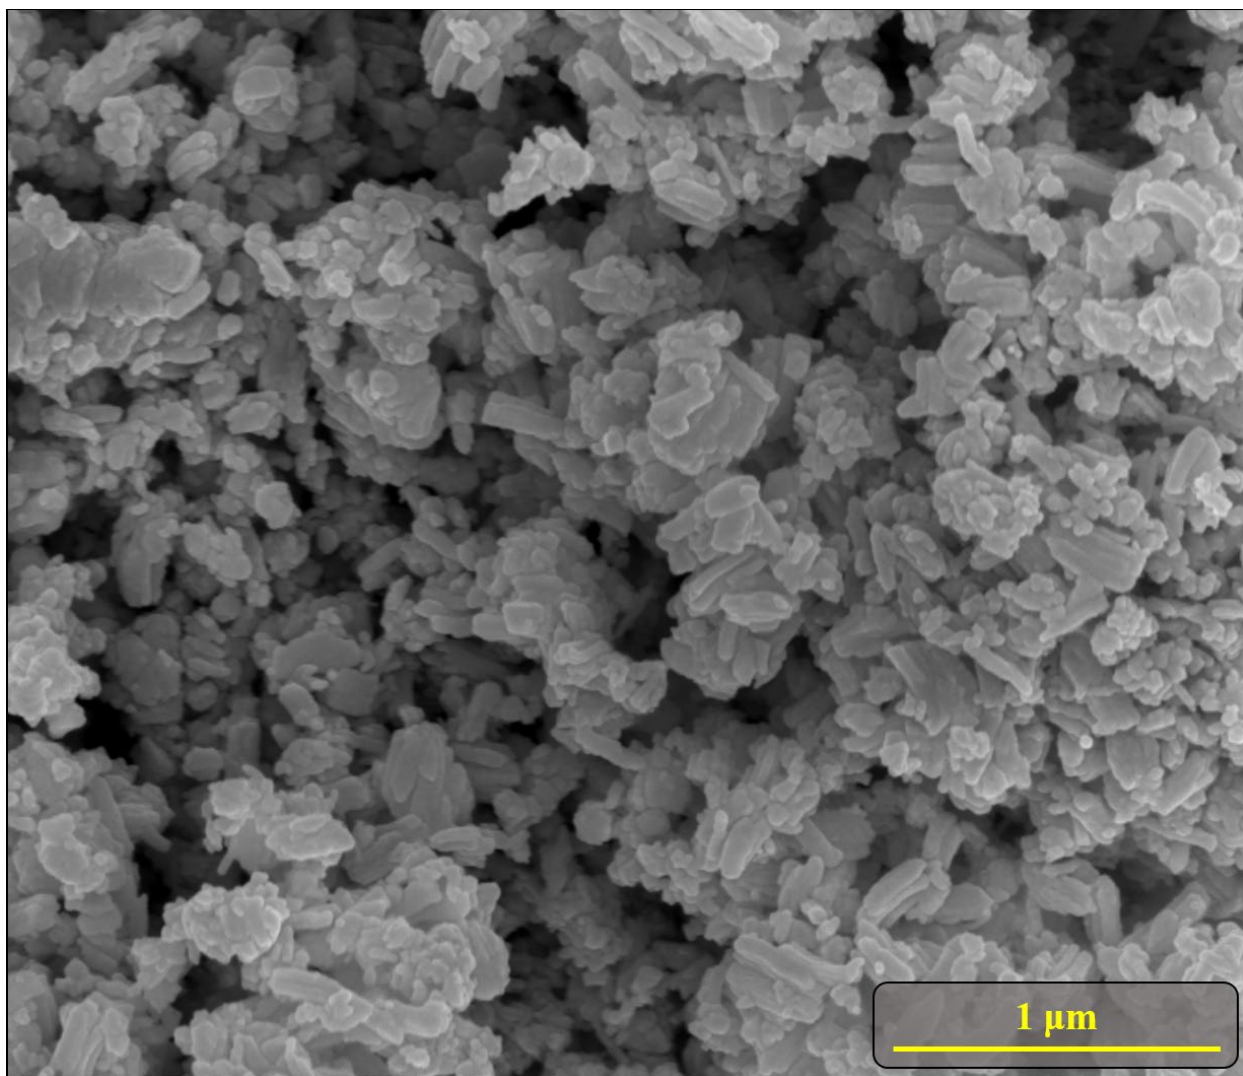

Figure S-2. SEM image representative of the UO<sub>2</sub> synthesized from Am-UO<sub>3</sub>. The nanoparticles of these samples consist of a bimodal distribution. One mode is comprised of large elongated particles with well-rounded edges and low sphericity, while the other mode is comprised of much smaller, rounded particles with well-rounded edges moderate sphericity. Particles from each mode vary widely in size and shape. The morphology of the UO<sub>2</sub> synthesized from Am-UO<sub>3</sub> closely resembles the morphology of the Am-UO<sub>3</sub> from which it was made.

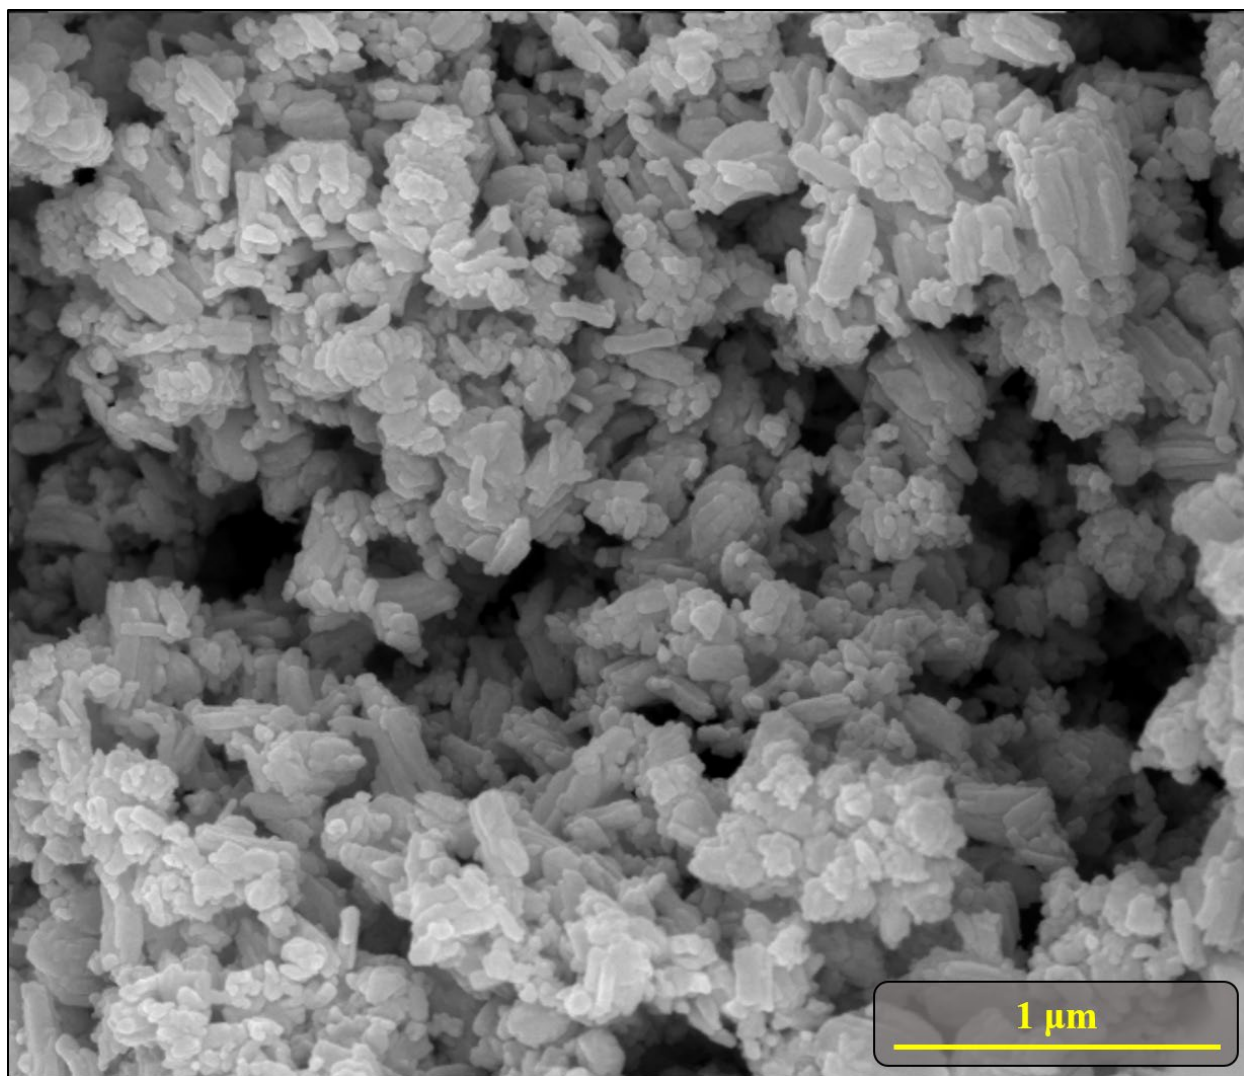

Figure S-3. SEM image representative of the UO<sub>2</sub> synthesized from Am-UO<sub>3</sub> exhibiting the morphology and bimodal distribution discussed in Figure S-2.

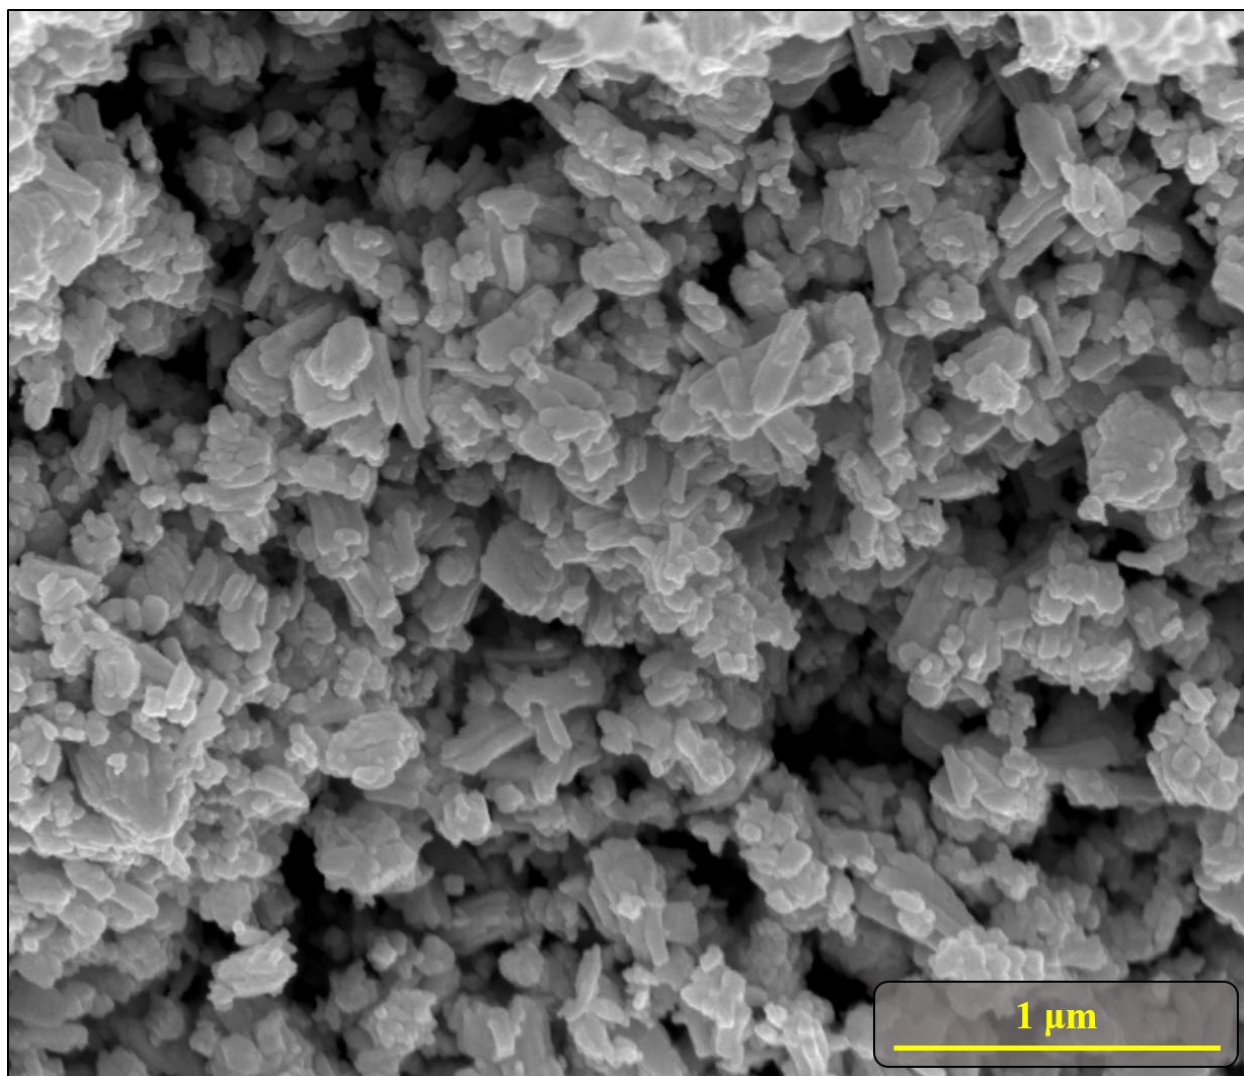

Figure S-4. SEM image representative of the morphology of  $\text{UO}_2$  synthesized from  $\text{Am-UO}_3$  as described in Figure S-2.

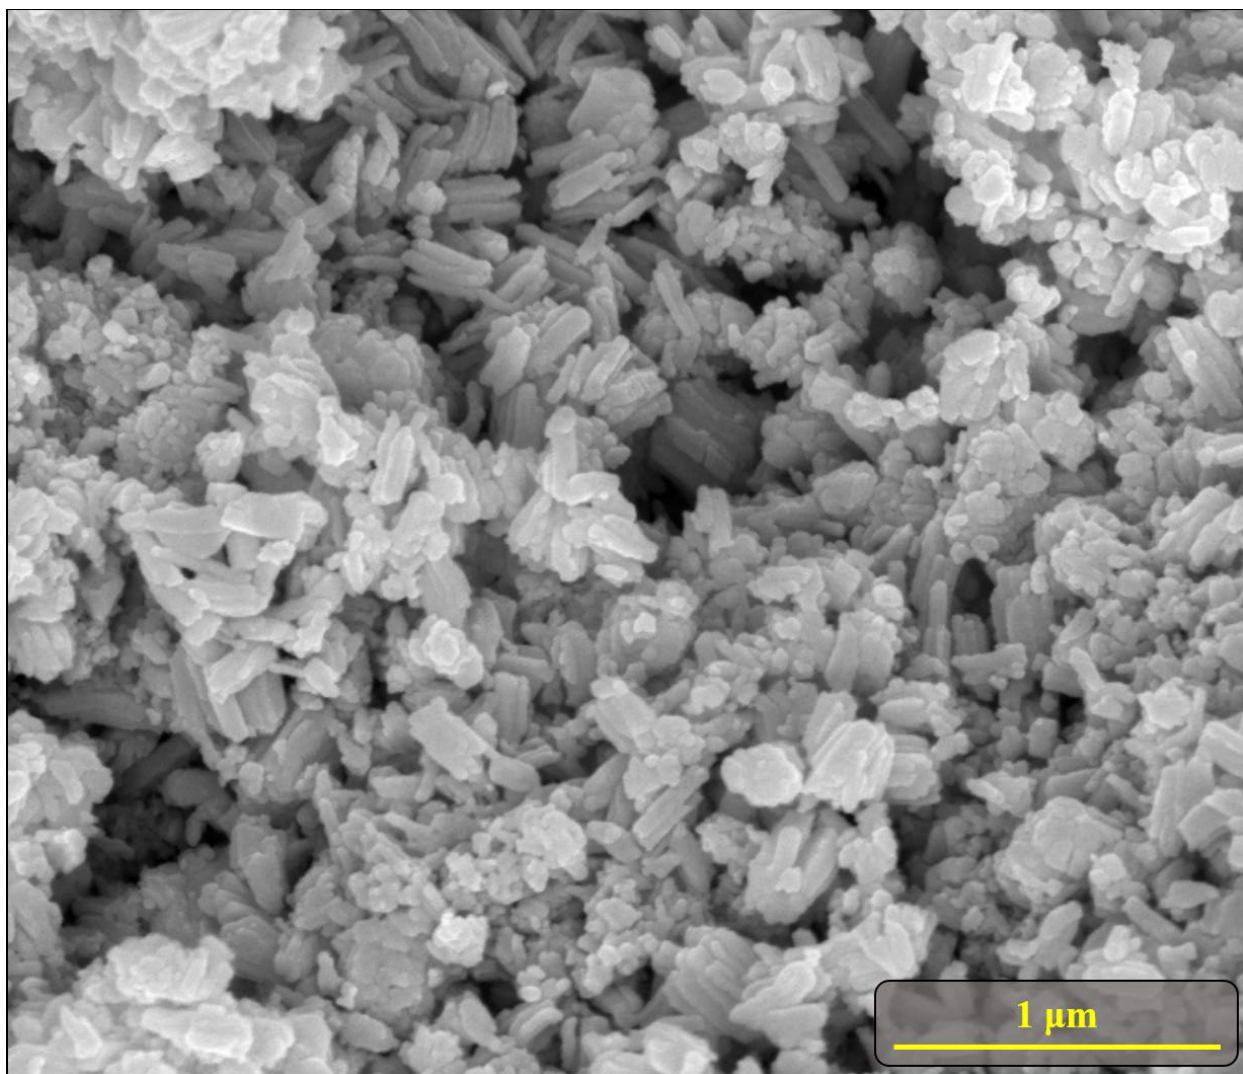

Figure S-5. SEM image representative of the UO<sub>2</sub> synthesized from Am-UO<sub>3</sub> as described in Figure S-2 with good examples of the larger elongated particles and small rounded particles.

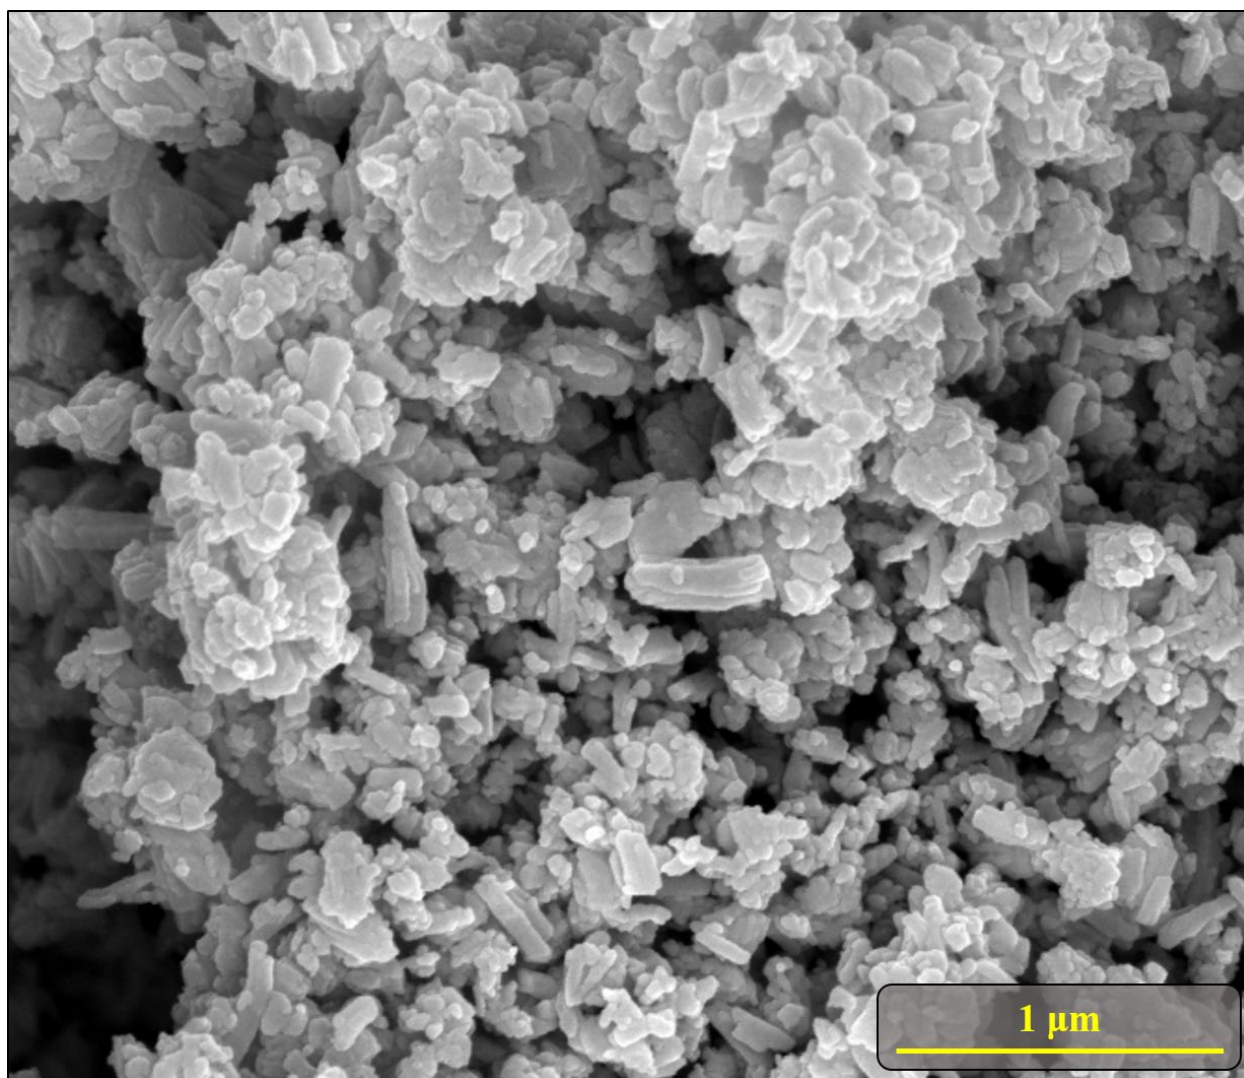

Figure S-6. SEM image representative of the morphology of UO<sub>2</sub> synthesized from Am-UO<sub>3</sub> described in Figure S-2 which highlights the bimodal nature of the morphology.

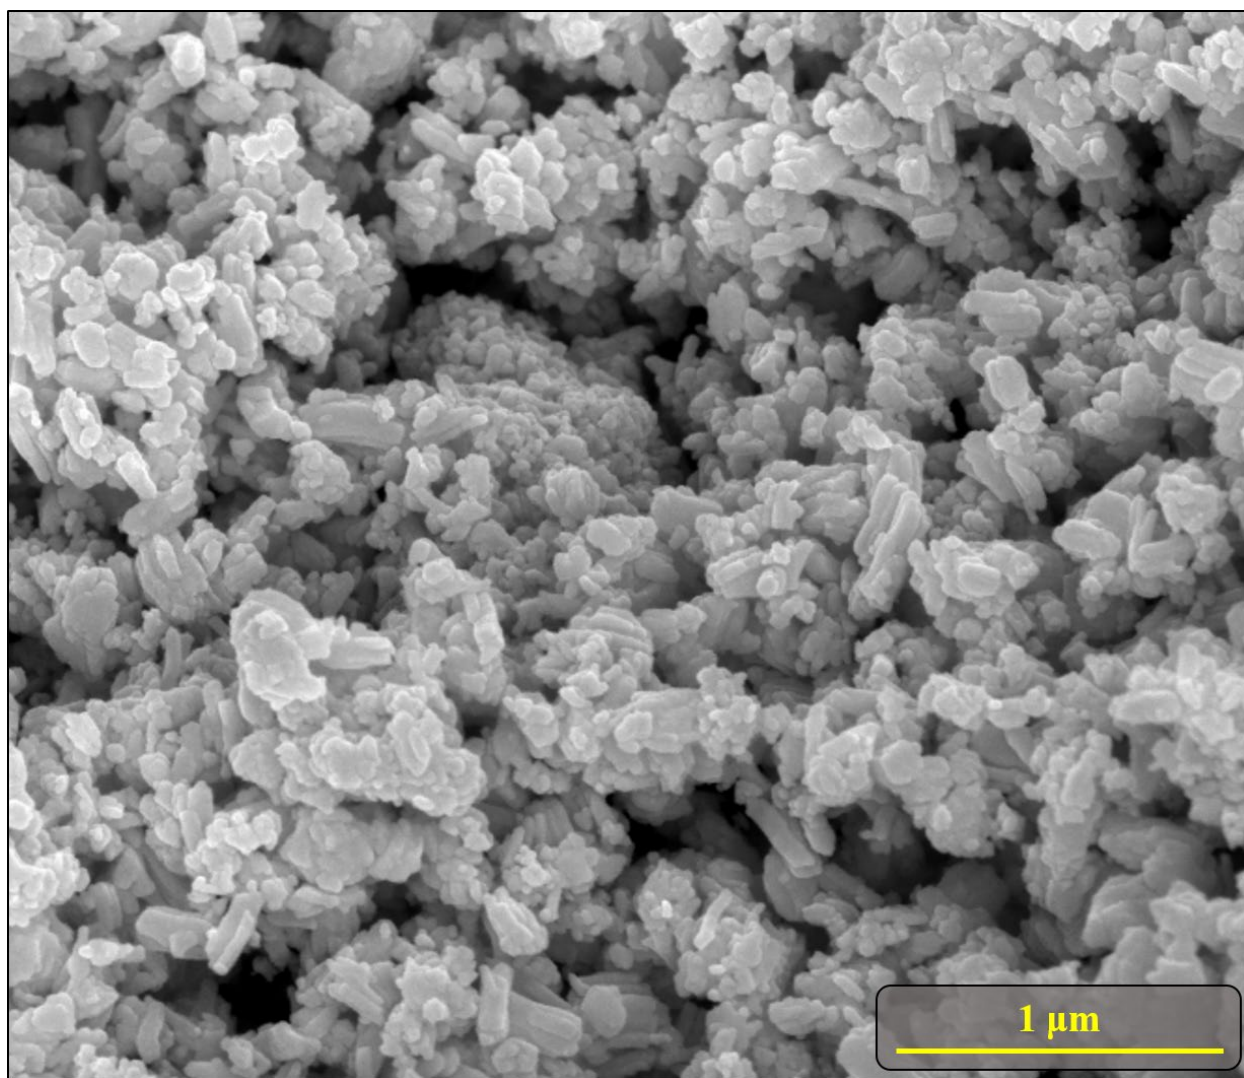

Figure S-7. SEM image representative of the morphology of UO<sub>2</sub> synthesized from Am-UO<sub>3</sub> as described in Figure S-2 and highlights the smaller rounded particles, though there is still an abundance of the larger elongated particles.

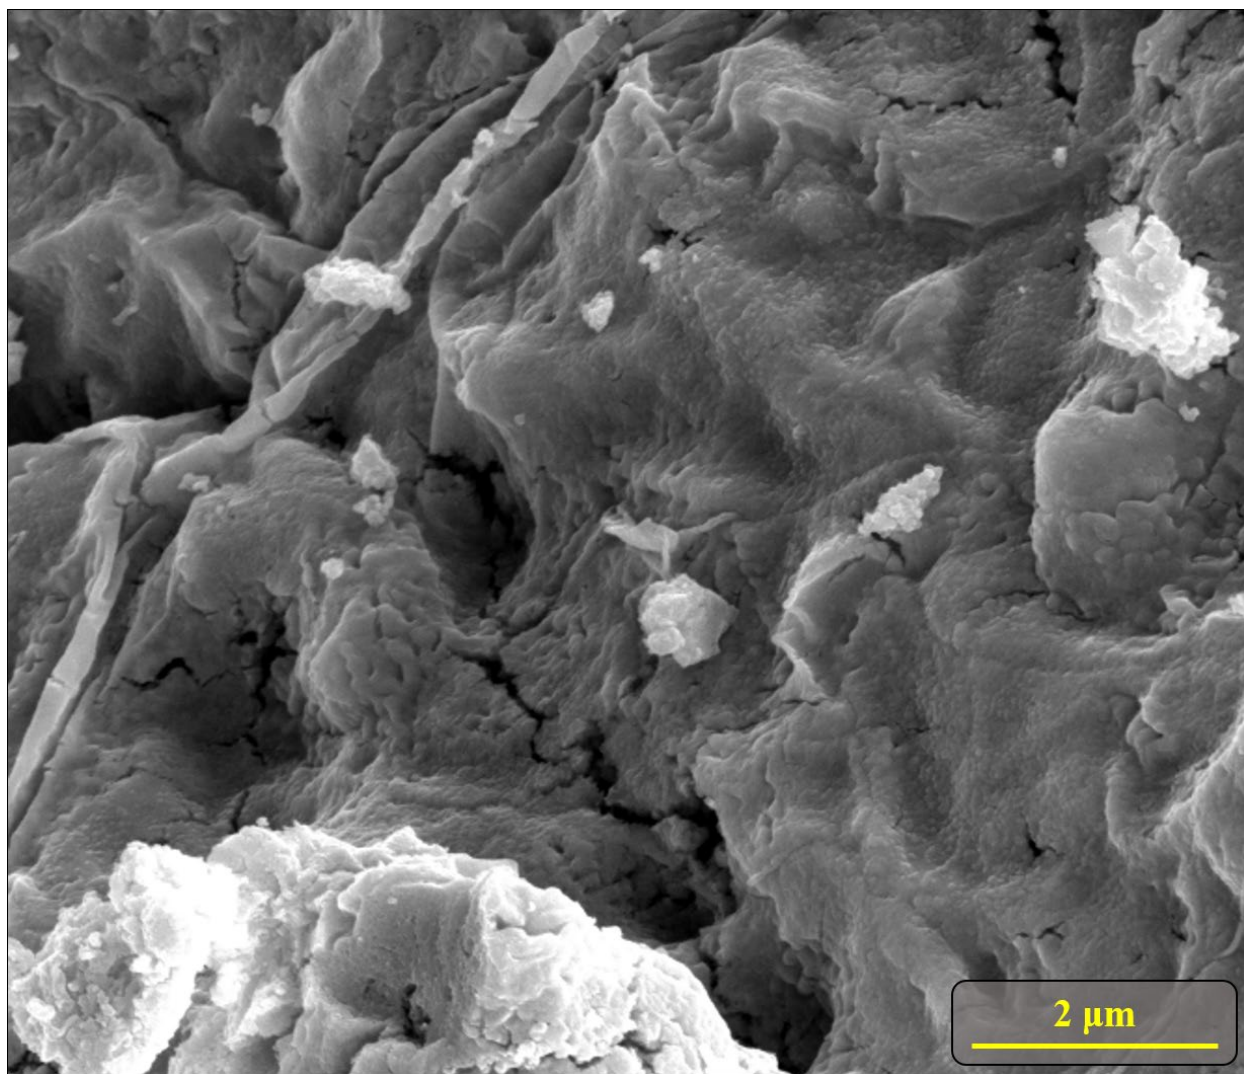

Figure S-8. SEM image representative of UO<sub>2</sub> synthesized from  $\alpha$ -UO<sub>3</sub>. The morphology of these particles is complicated, and the morphology is inconsistent even on the same particle. The morphology of the UO<sub>2</sub> synthesized from  $\alpha$ -UO<sub>3</sub> resembles the  $\alpha$ -UO<sub>3</sub> from which it was made. In this image a variety of morphologies are observed including concave surfaces which smooth in some areas, rough in some area, or ornamented in others with rounded discs. This images also shows several rough surface fractures, irregular blocky surface particles with angular edges, and even smooth ribbons with rounded edges.

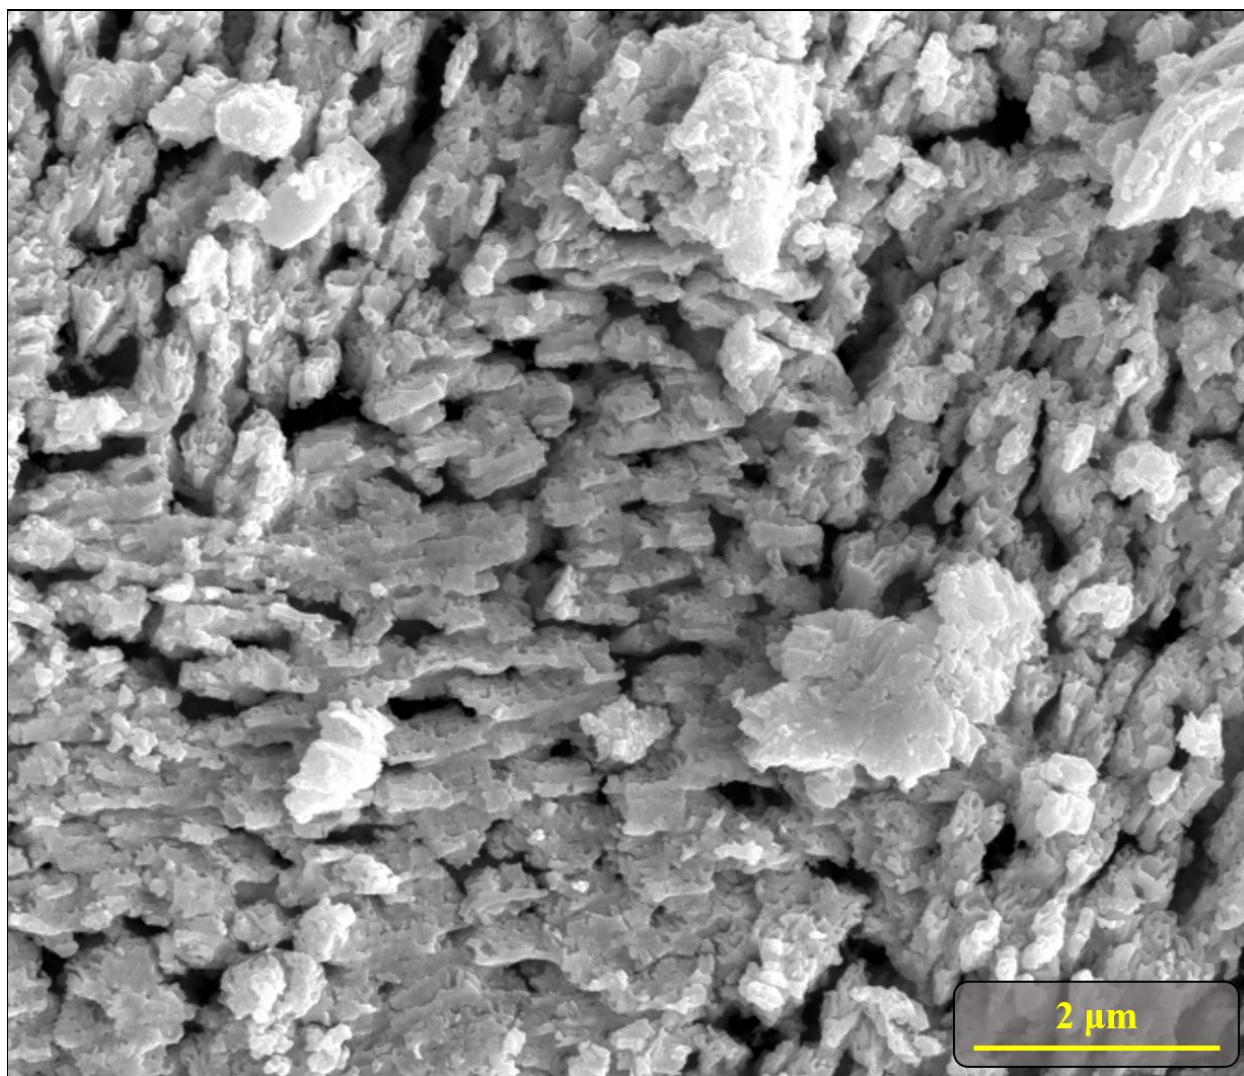

Figure S-9. SEM image representative of the morphology of  $\text{UO}_2$  synthesized from  $\alpha\text{-UO}_3$ . This image highlights the presence of both polyhedral and irregular surface particles with very angular edges.

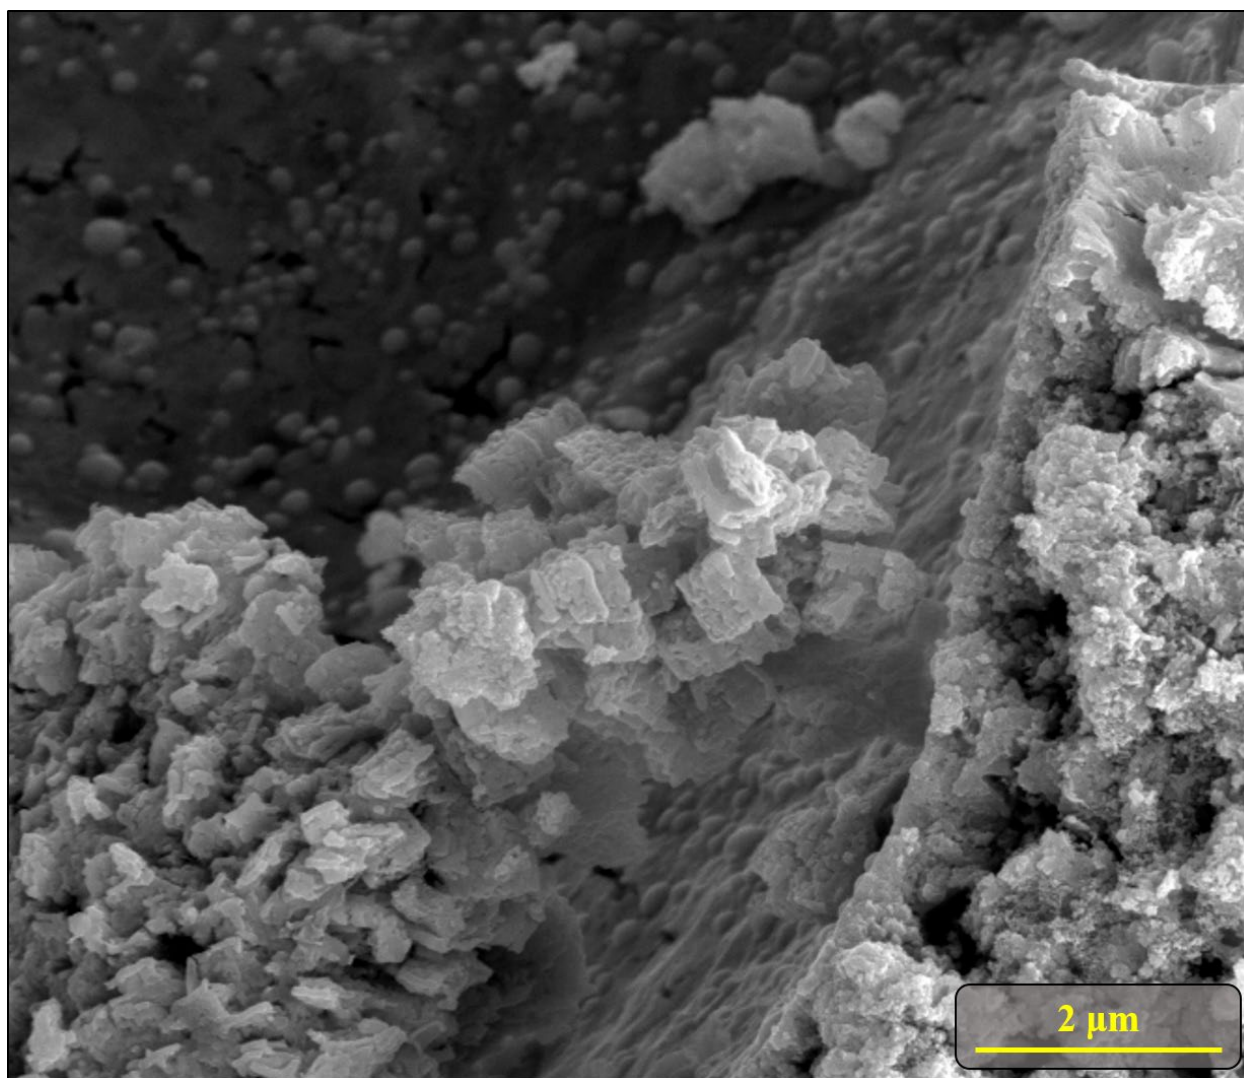

Figure S-10. SEM image representative of the morphology of  $\text{UO}_2$  synthesized from  $\alpha\text{-UO}_3$ . This image shows the presence of flat surface with rounded, spherical surface ornaments, surface fractures, polyhedral, columnar surface particles with angular edges, and small rounded particles with moderate sphericity.

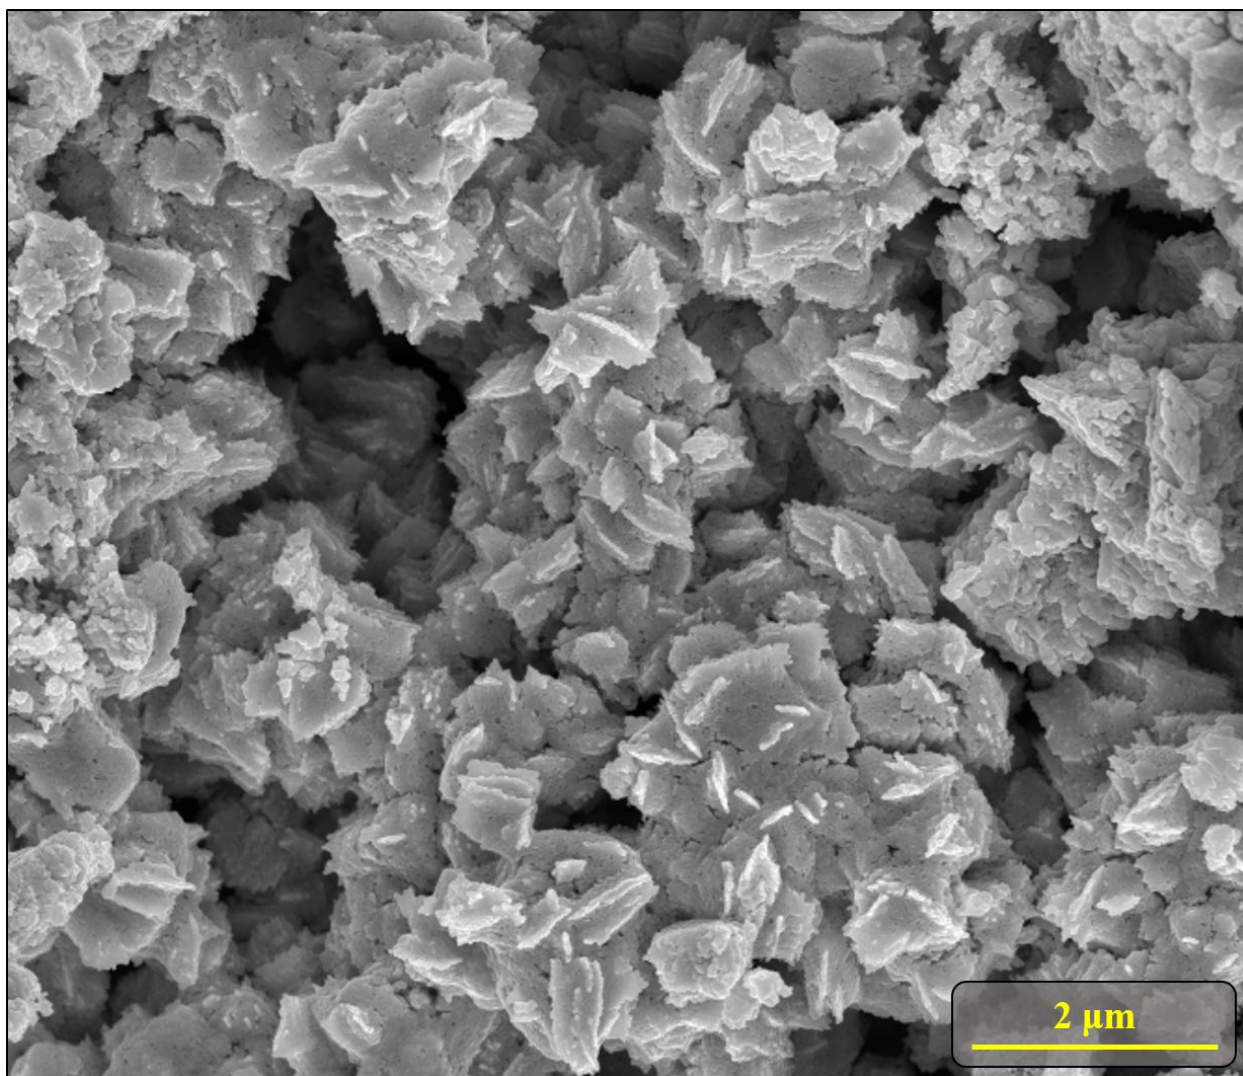

Figure S-11. SEM image representative of  $\text{UO}_2$  synthesized from  $\alpha\text{-UO}_3$ . The morphology in this image features flat blades and irregular, blocky surface particles with very angular edges.

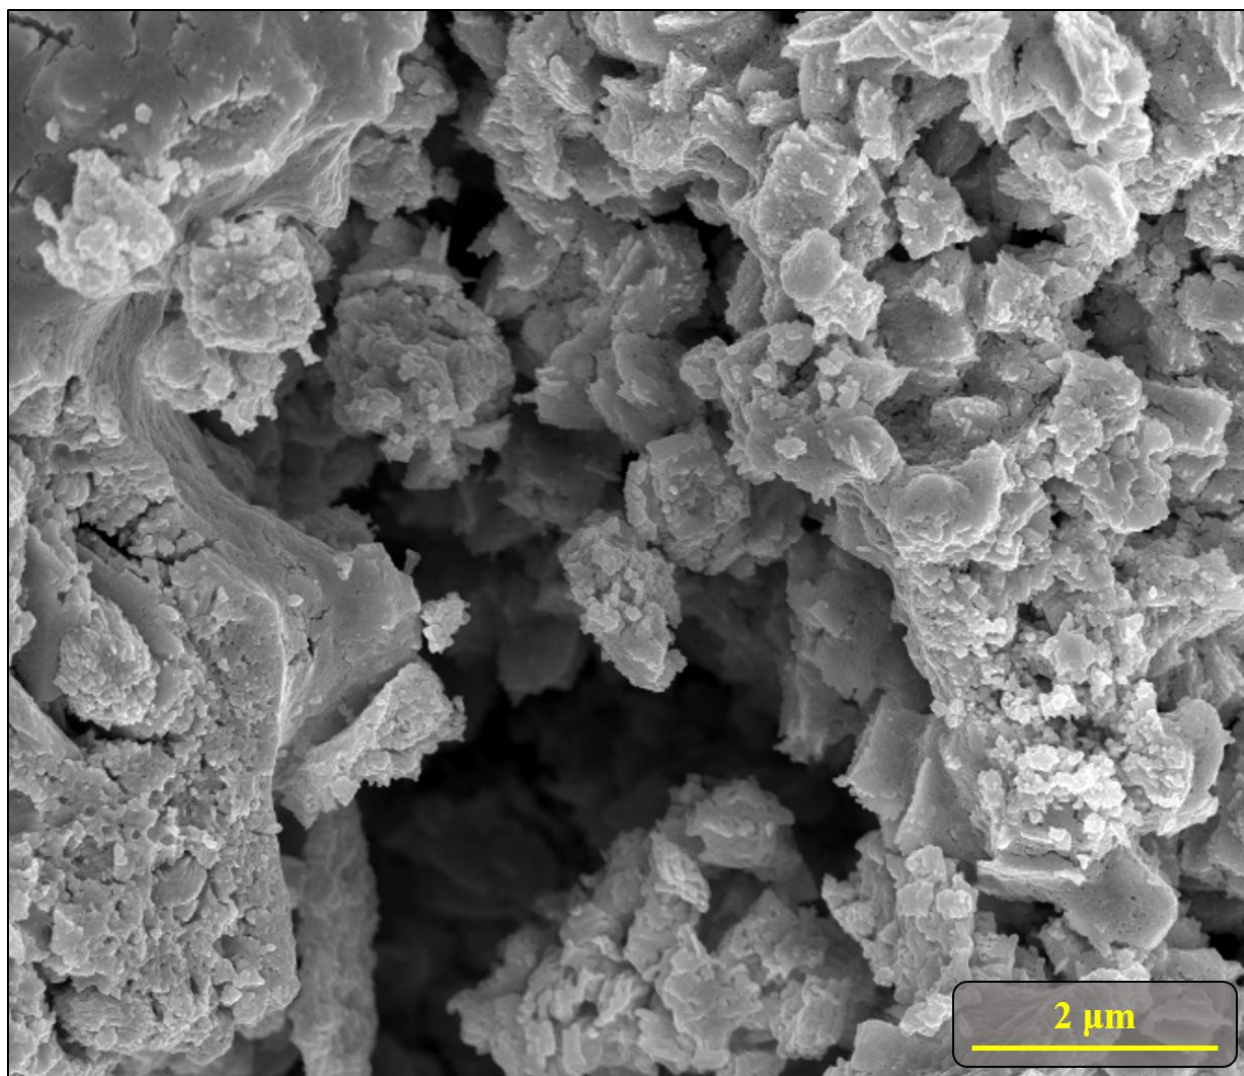

Figure S-12. SEM image representative of  $\text{UO}_2$  synthesized from  $\alpha\text{-UO}_3$ . The morphology of this image is representative of smooth concave surfaces, large, irregular, blocky surface particles, flat blades, and small rounded particles.

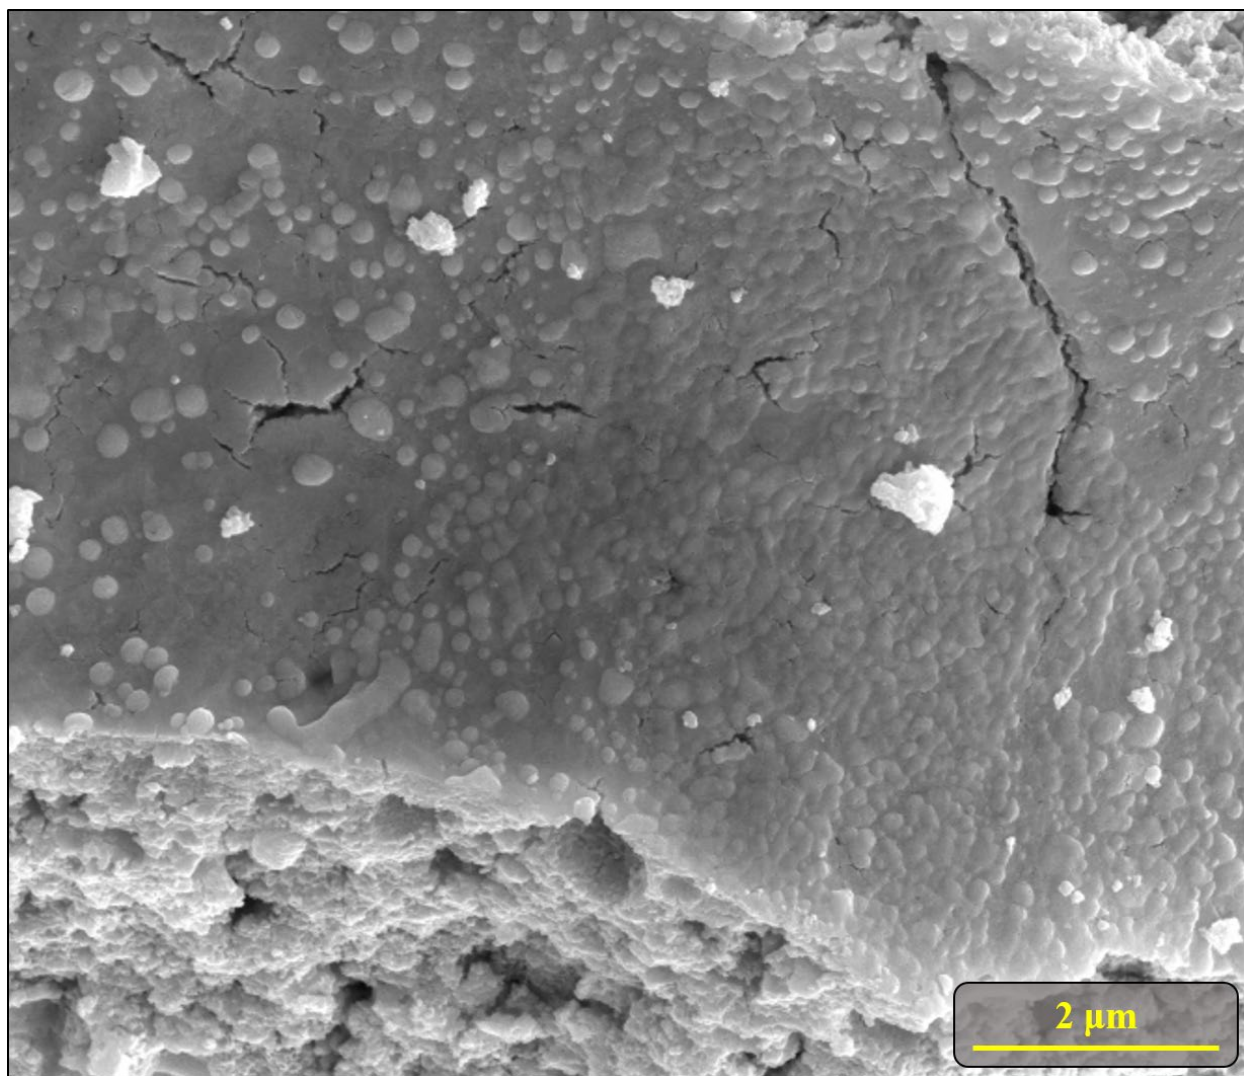

Figure S-13. SEM image representative of the morphology of UO<sub>2</sub> synthesized from α-UO<sub>3</sub>. the bulk of this image is a smooth flat surface with surface ornamentation characterized by rounded discs, and also featuring surface cracks and irregular surface particles. The smooth surface appears to be a crust, and the morphology of the underlying particle is very rough.

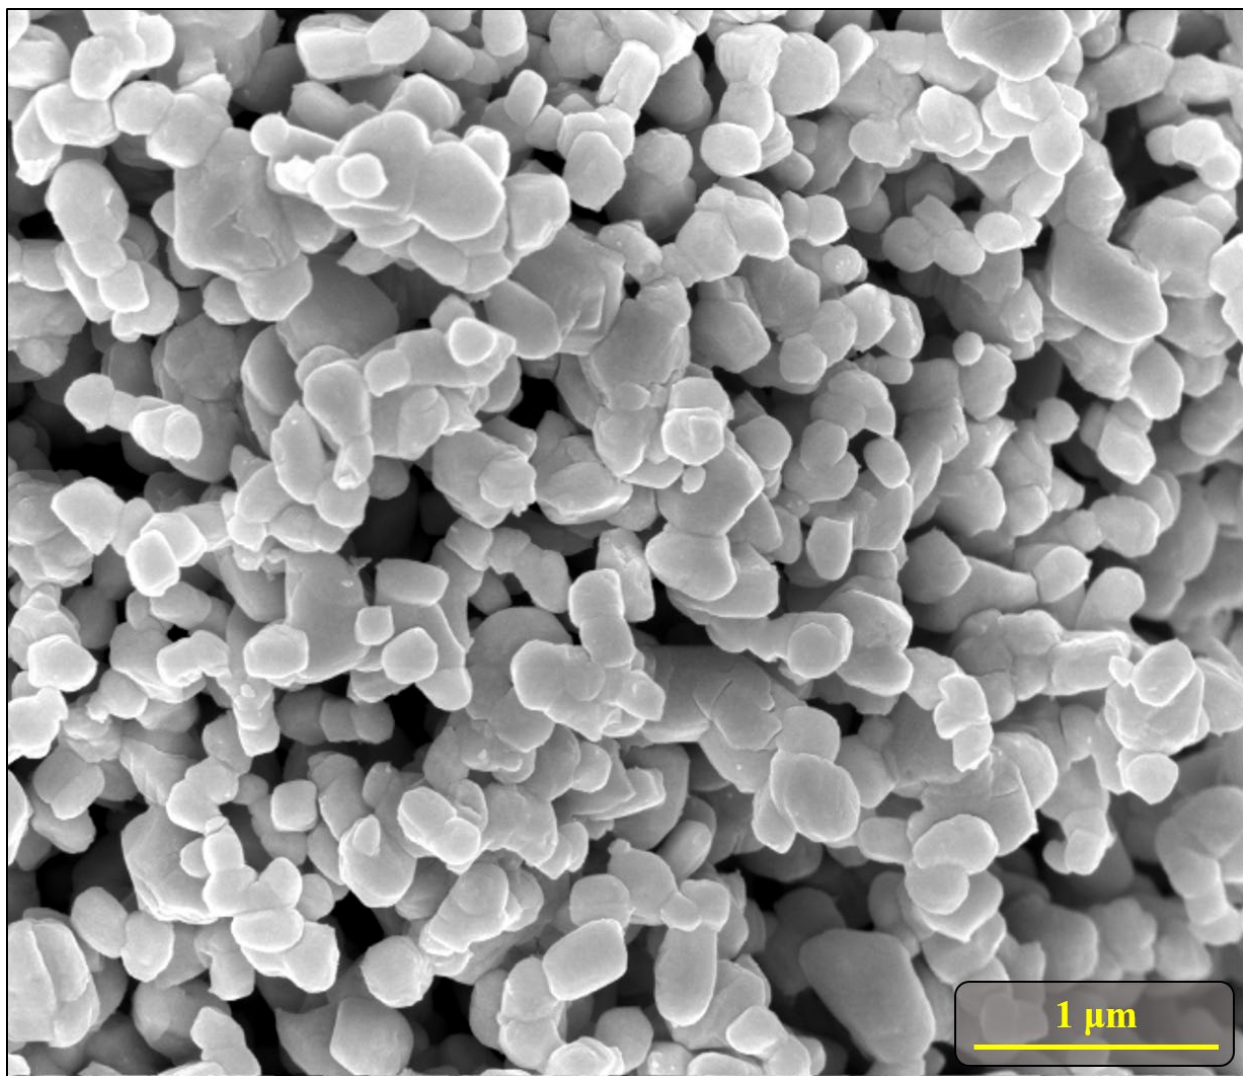

Figure S-14. SEM image representative of UO<sub>2</sub> synthesized from U<sub>3</sub>O<sub>8</sub>. The morphology of these particles have a morphology which consists of smooth, rounded particles with well-rounded edges and moderate sphericity. They are larger, have higher circularity, and greater uniformity in size and shape than the UO<sub>2</sub> synthesized from Am-UO<sub>3</sub>. The morphology of the UO<sub>2</sub> synthesized from U<sub>3</sub>O<sub>8</sub> resembles the morphology of the U<sub>3</sub>O<sub>8</sub> from which it was made.

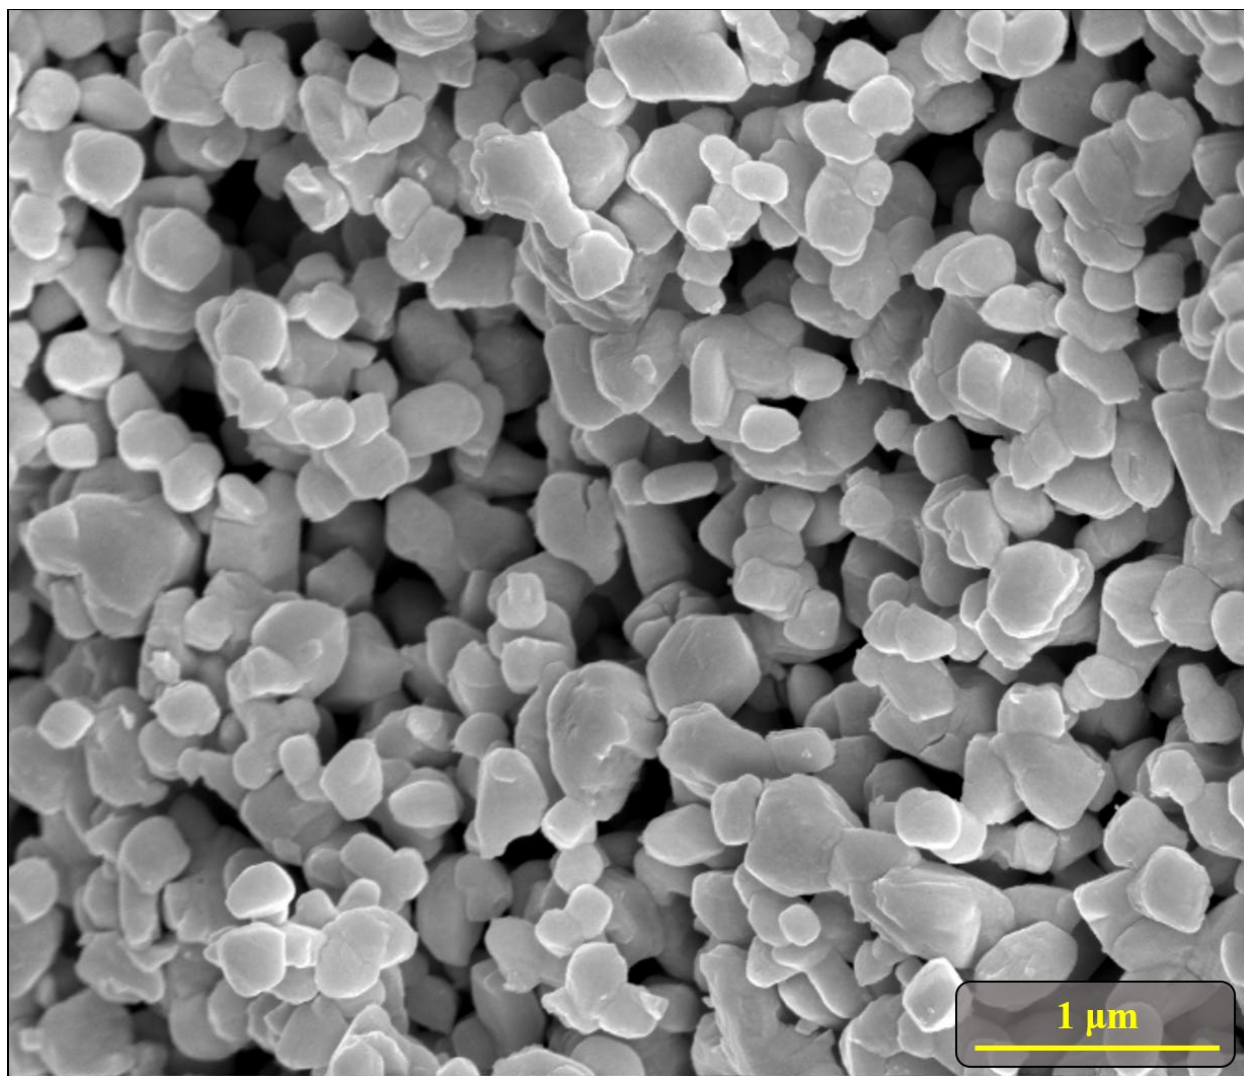

Figure S-15. SEM image representative of the morphology of  $\text{UO}_2$  synthesized from  $\text{U}_3\text{O}_8$  as described in Figure S-14.

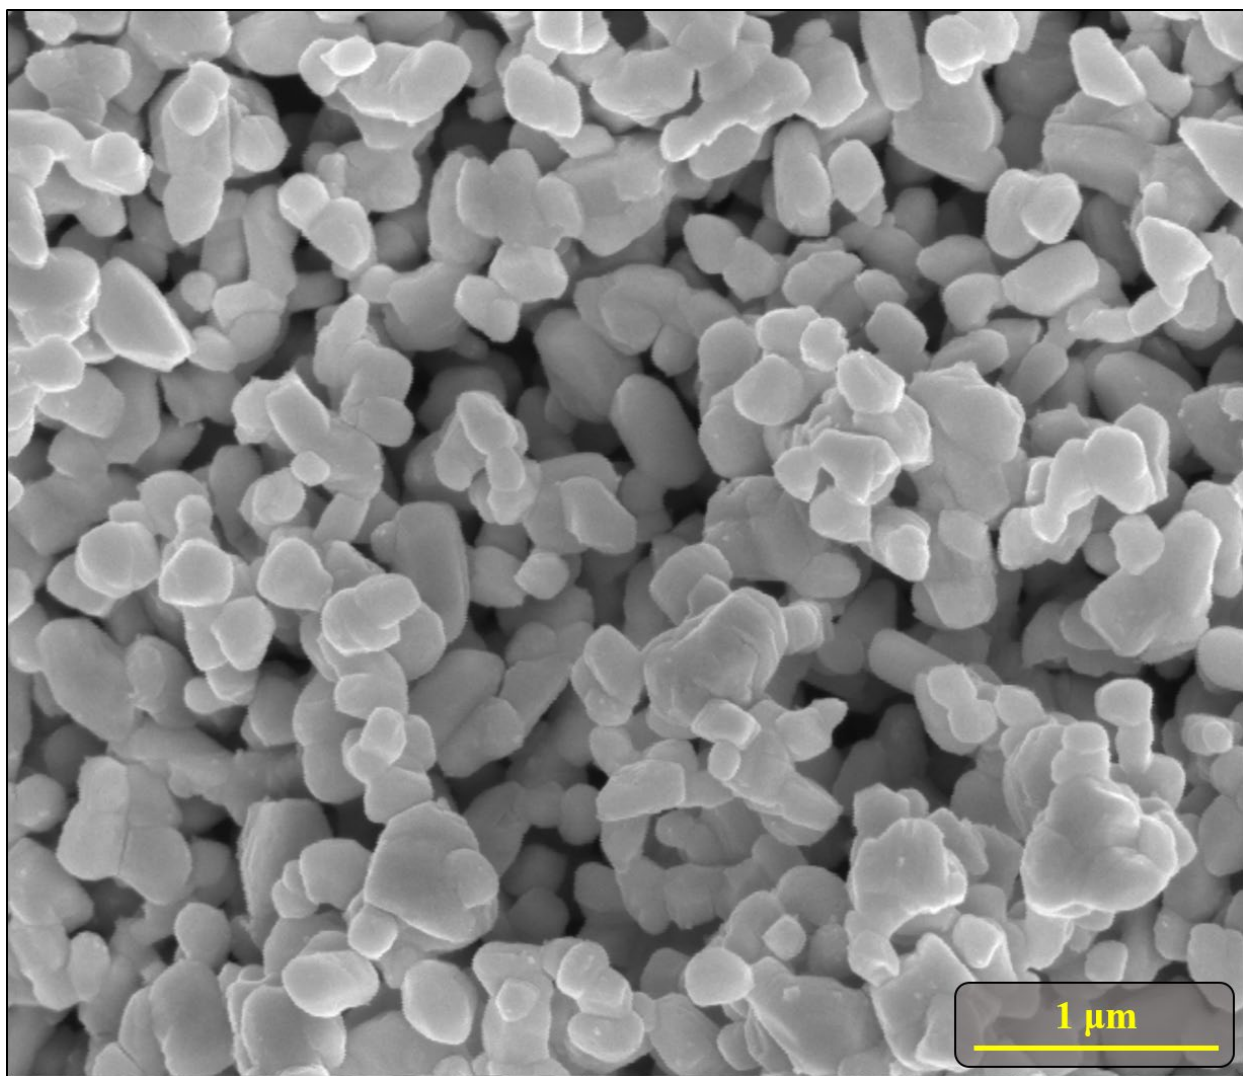

Figure S-16. SEM image representative of UO<sub>2</sub> synthesized from U<sub>3</sub>O<sub>8</sub> with morphology described in Figure S-14.

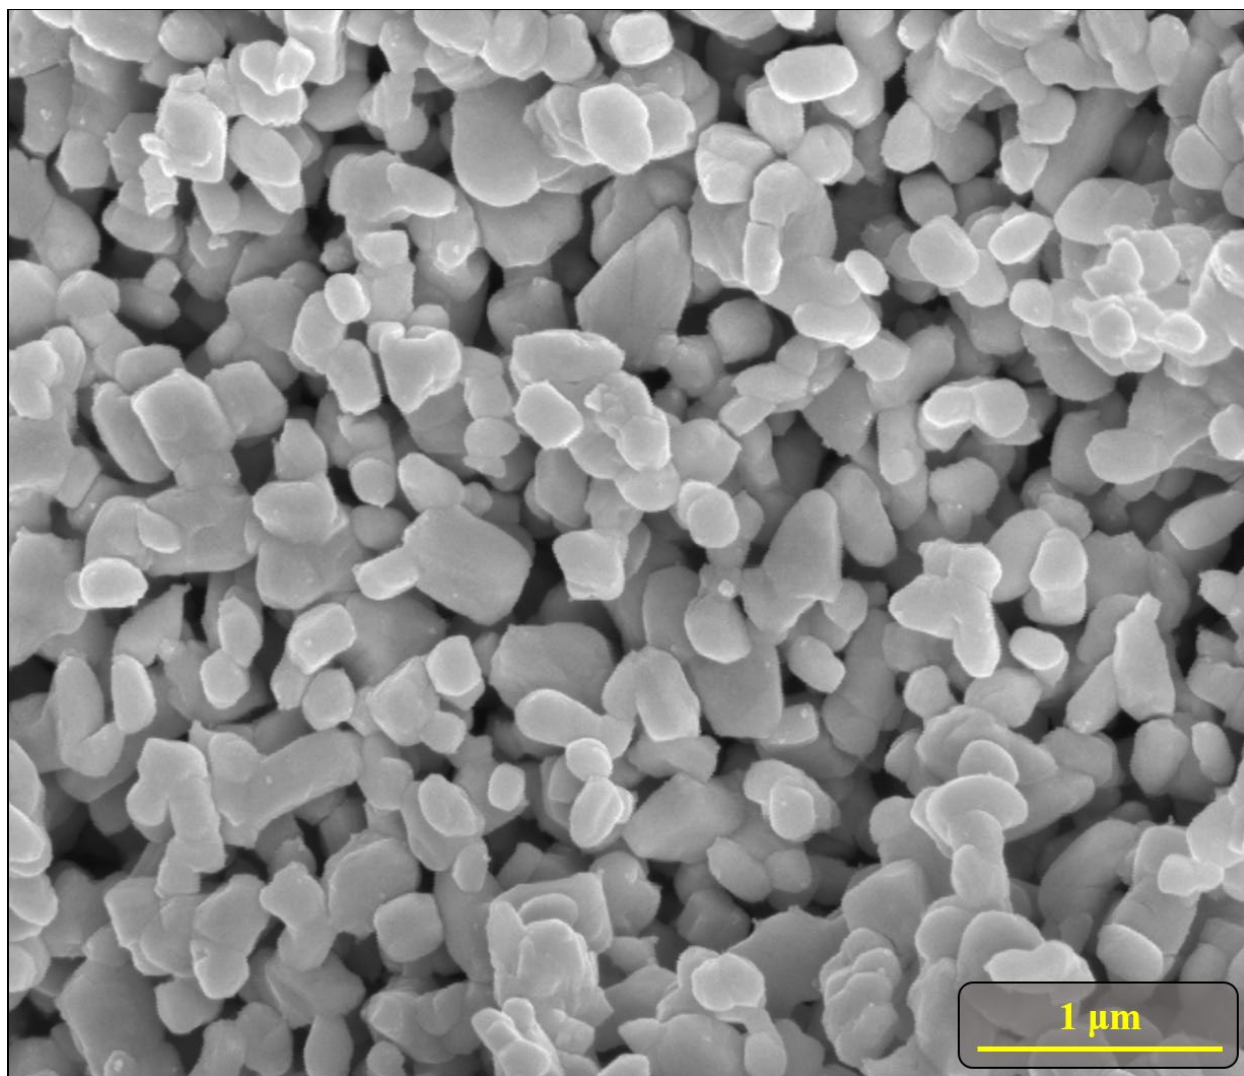

Figure S-17. SEM image representative of the morphology of UO<sub>2</sub> synthesized from U<sub>3</sub>O<sub>8</sub> as described in Figure S-14.

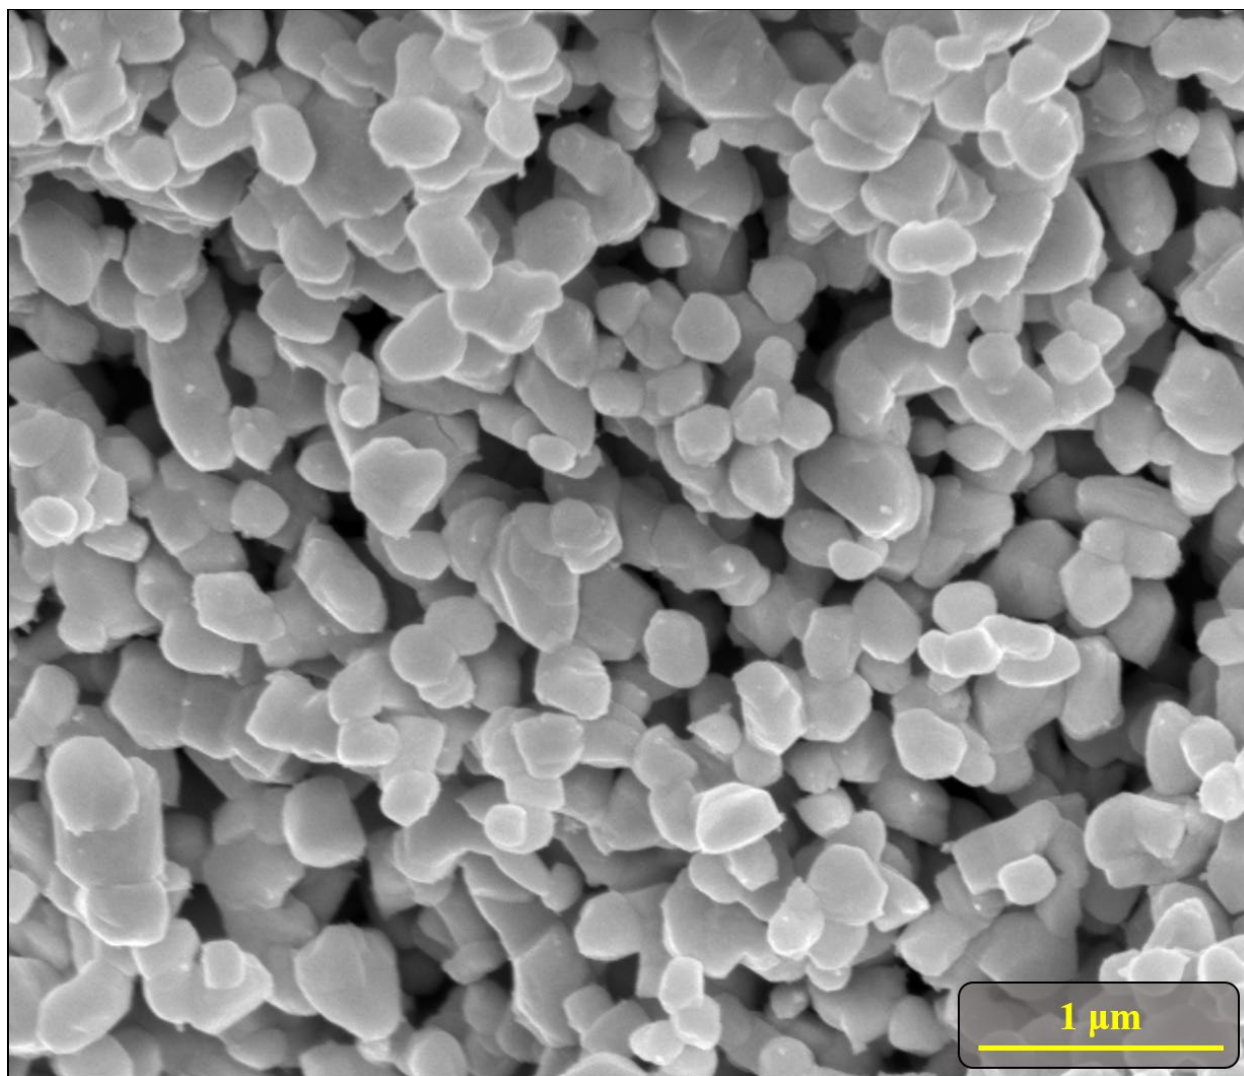

Figure S-18. SEM image representative of the morphology of  $\text{UO}_2$  synthesized from  $\text{U}_3\text{O}_8$  as described in Figure S-14.

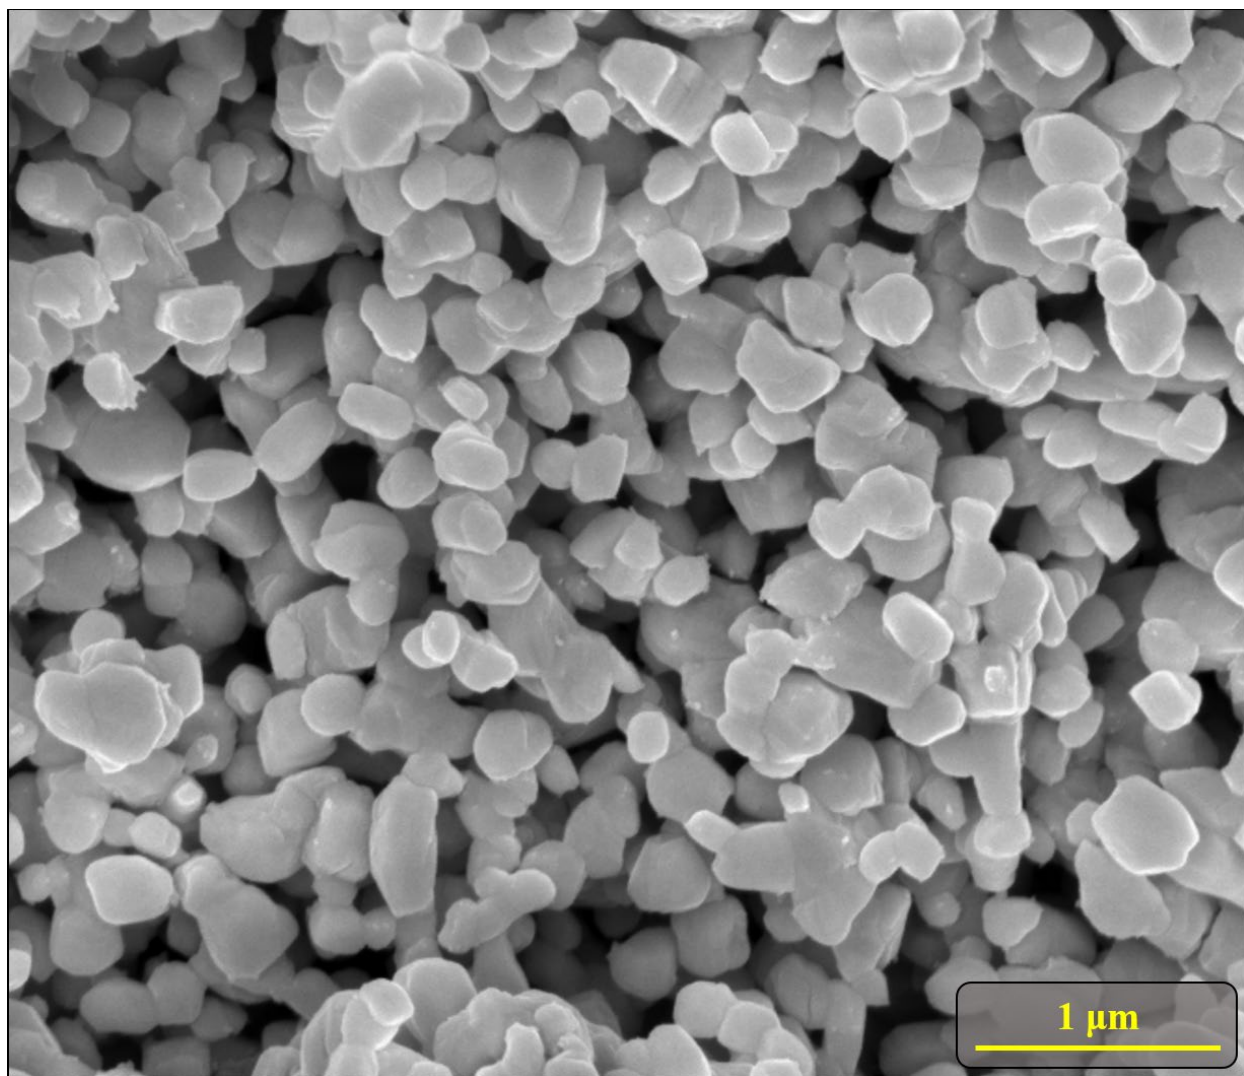

Figure S-19. SEM image representative of morphology of  $\text{UO}_2$  synthesized from  $\text{U}_3\text{O}_8$  as has been described in Figure S-14.

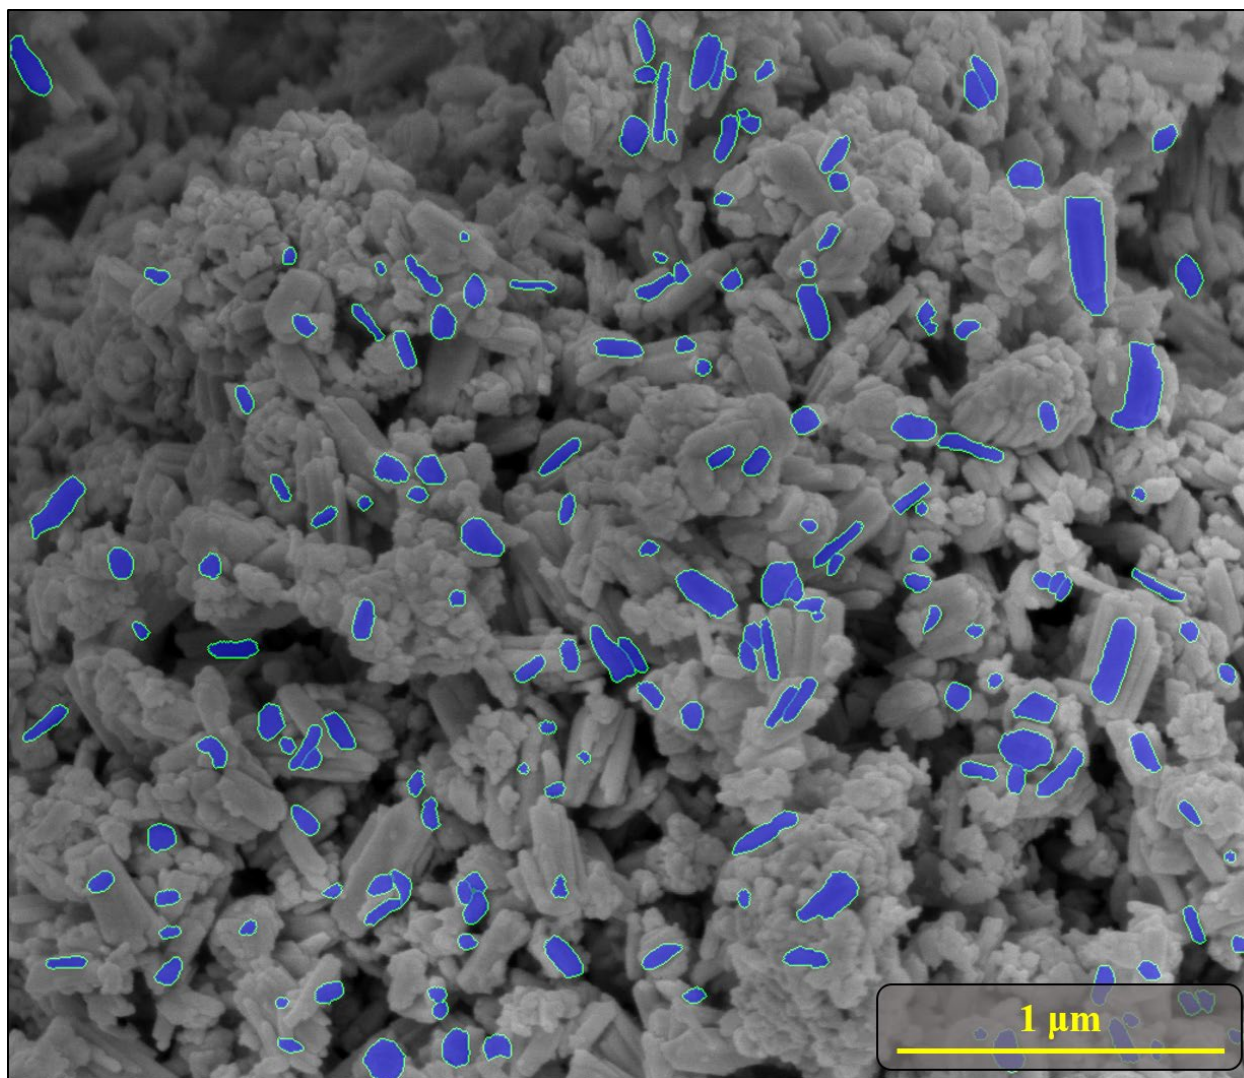

Figure S-20. An example of a segmented image of Am-UO<sub>3</sub>. Using the MAMA software nano-particles are segmented to identify, isolate, and measured. Images were segmented using the procedure established by Olsen et al. to identify and isolate nano-particles for segmentation [1].

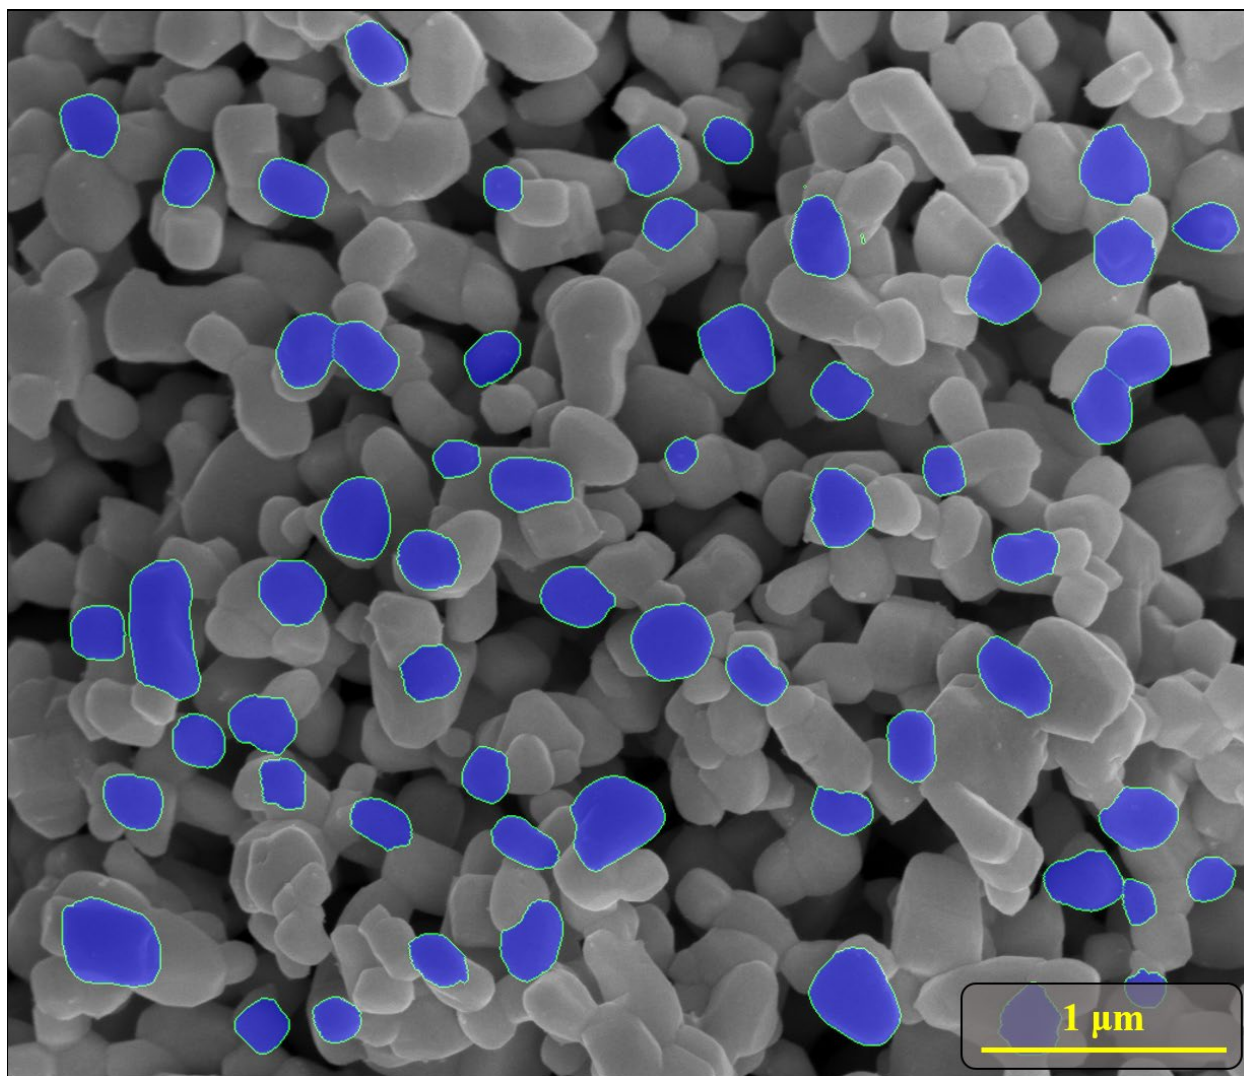

Figure S-21. An example of a segmented image of  $\text{U}_3\text{O}_8$ . Using the MAMA software nano-particles are segmented to identify, isolate, and measured. Images were segmented using the procedure established by Olsen et al. to identify and isolate nano-particles for segmentation [1].

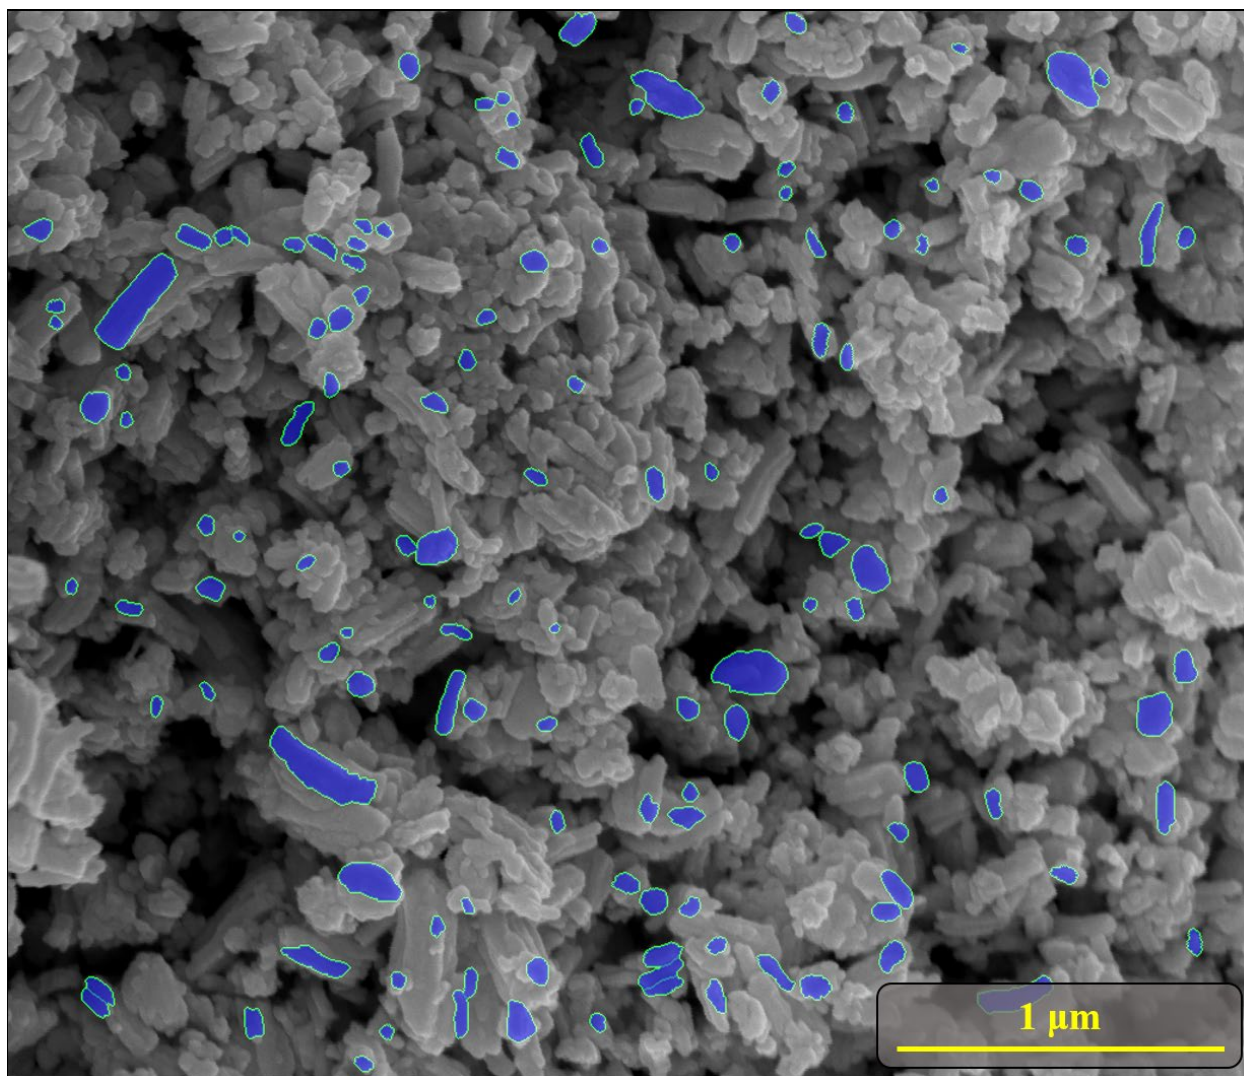

Figure S-22. An example of a segmented image of UO<sub>2</sub> synthesized from Am-UO<sub>3</sub>. Using the MAMA software nano-particles are segmented to identify, isolate, and measured. Images were segmented using the procedure established by Olsen et al. to identify and isolate nano-particles for segmentation [1].

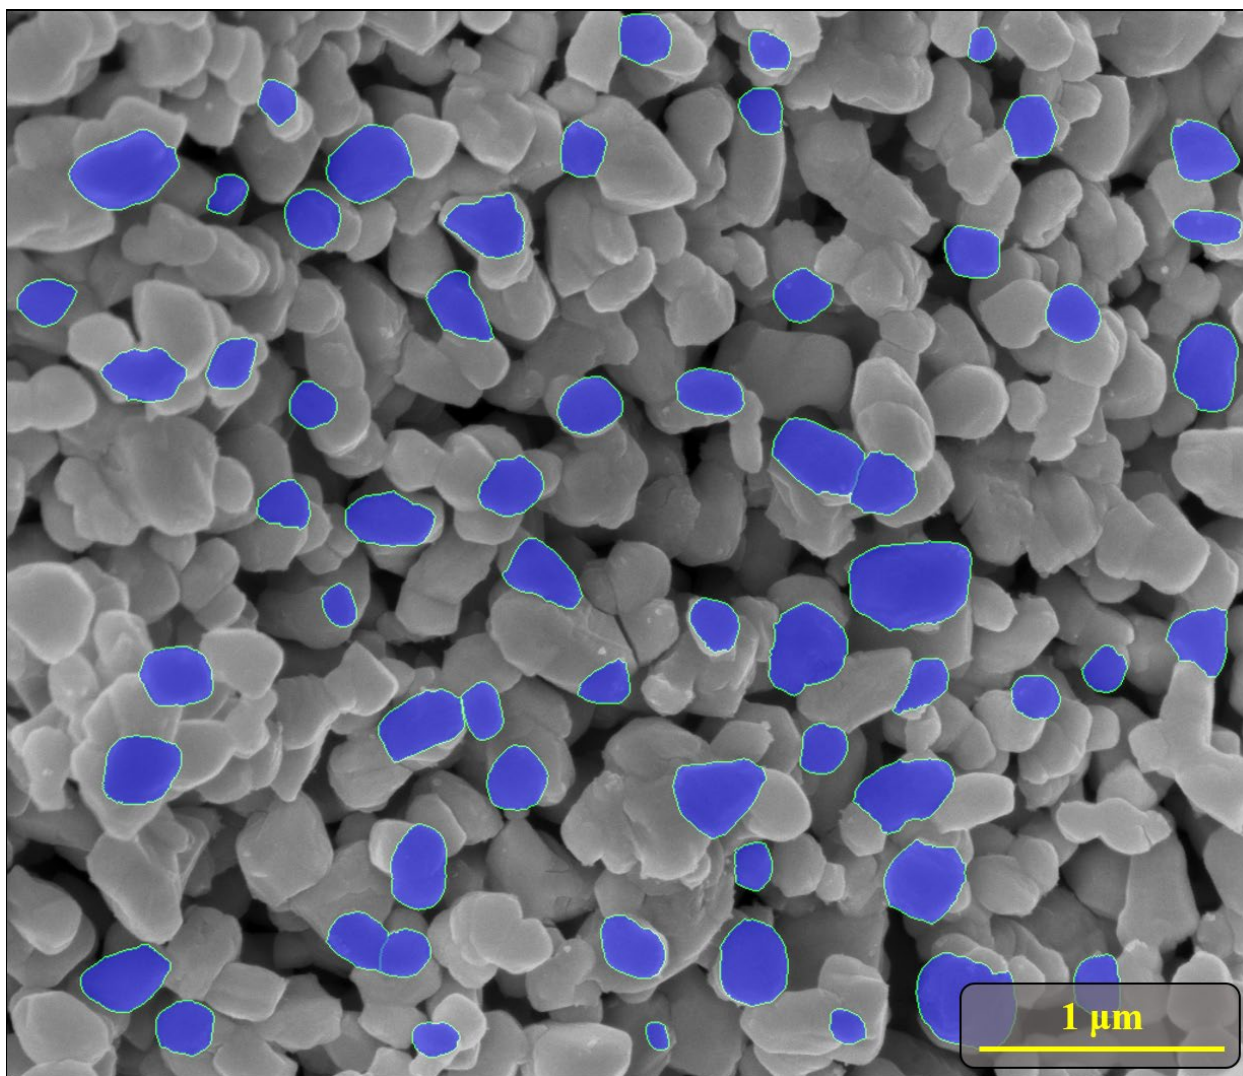

Figure S-23. An example of a segmented image of  $\text{UO}_2$  synthesized from  $\text{U}_3\text{O}_8$ . Using the MAMA software nano-particles are segmented to identify, isolate, and measured. Images were segmented using the procedure established by Olsen et al. to identify and isolate nano-particles for segmentation [1].

## References

1. Olsen, A.M., Richards, B., Schwerdt, I., Heffernan, S., Lusk, R., Smith, B., Jurrus, E., Ruggiero, C., McDonald IV, L.W.: Quantifying morphological features of  $\alpha\text{-U}_3\text{O}_8$  with image analysis for nuclear forensics. *Anal. Chem.* **89**, 3177 (2017).
